# Supplementary material for: Tachykinin signaling inhibits task-specific behavioral responsiveness in honeybee workers
Source: eLife. 2021 Mar 24;10:e64830. doi: 10.7554/eLife.64830 (PMC8016481; doi:10.7554/eLife.64830)
Supplement: Figure 5—source data 1. [file elife-64830-fig5-data1.xlsx]

## Sheet: Suppl.1 HEK293 Cells
Log (M)	TRP2			TRP3
-12	92.6094	98.3333	97.4974	93.1312	100	92.9969
-11	96.7383	91.1557	93.6625	92.086	97.3869	95.595
-10	72.1433	80.3662	73.4408	84.172	90.8395	88.129
-9	62.0505	61.6487	64.6985	72.5758	73.4731	66.5477
-8	39.3417	38.9933	33.9876	49.0125	48.4899	40.9813
-7	18.9281	12.1701	11.2282	23.7138	20.6042	26.4738
-6	7.76591	5.30362	8.63447	19.3191	12.3643	13.3614
-5	5.4278	4.85842	7.29431	9.51336	5.2301	6.75317
-4	6.86545	5.44214	6.7148	5.15598	4.93057	5.65776

## Sheet: Suppl.1 Sf21 Cells
Log (M)	TRP2			TRP3
-12	92.3887	98.2368	98.3115	95.2946	98.1256	92.1545
-11	96.7722	92.2369	91.4817	93.4444	100	96.2965
-10	80.4598	86.2073	87.5948	93.5892	92.3234	96.9419
-9	79.5758	73.4731	72.5477	79.8334	84.1204	84.2025
-8	59.0125	64.4899	60.9813	73.9138	70.3389	76.0795
-7	40.7137	35.6041	42.4738	53.7851	58.0646	56.8212
-6	31.3191	30.3643	34.3614	40.251	48.0008	38.3975
-5	24.5134	25.2301	28.7532	39.1647	34.4531	41.6285
-4	26.6823	24.9306	19.6578	26.3879	30.2236	35.2235
