# Supplementary material for: Tachykinin signaling inhibits task-specific behavioral responsiveness in honeybee workers
Source: eLife. 2021 Mar 24;10:e64830. doi: 10.7554/eLife.64830 (PMC8016481; doi:10.7554/eLife.64830)
Supplement: Figure 5—source data 2. [file elife-64830-fig5-data2.xlsx]

## Sheet: Suppl.2A
	ddH2O			TRP2			TRP3
CRE-L	1.44609	1.34032	1.04727	1.74151	1.63575	1.34269	1.64568	1.49874	1.28124
V/CRE-L	1.46204	1.42245	1	1.82605	1.4398	1.44699	1.51005	1.31058	1.58413
TRPR/CRE-L	1.63235	1.42659	1.93353	16.6529	14.8065	17.4357	13.8259	14.599	13.3697

## Sheet: Suppl.2B
	TRP2			TRP3			SNF			PDH			CRZ
ctl	1.29937	1.58752	1.59111	1.12522	1.55655	1.36311	1.23205	1.12522	1.55655	1.36311	1.2105	1	1.4632	1.30072	1.0588
1nM	8.92011	8.76302	6.50898	5.90215	6.31436	5.06355	1.27469	2.00494	1.9605	1.37792	1.72756	1.14273	1.53052	1.30206	1.23653
1uM	25.3007	22.4955	26.4901	20.377	19.4621	17.3042	2.19704	1.58752	2.03995	1.32361	1.26347	1.5193	1.7482	1.13869	1.14228

## Sheet: Suppl.2C
	TRP2			TRP3			SNF			PDH			CRZ
ctl	1.28	0.988	1.3	1.37	1	1.36	1.43	1.13	1.55	1.15	1.43	1	1.11	1.52	1.11
1nM	10.4	8.78	10.6	10.1	7.63	8.81	1.19	1.41	1.17	1.3	1.62	1.52	1	1.26	1.44
1uM	16.7	14.4	16.9	15.2	15.4	14.3	1.57	1.4	1.16	1.12	1.4	1.47	1.41	1.65	1.71

## Sheet: Suppl.2D
Log (M)	TRP2			TRP3
-12	3.15598	2.93057	5.65776	6.86545	5.44214	6.7148
-11	6.51336	2.2301	8.75317	5.4278	4.85842	7.29431
-10	9.3191	6.36434	10.3614	7.76591	5.30362	8.63447
-9	10.7137	14.6042	13.4738	8.92812	12.1701	11.2282
-8	29.0125	28.4899	20.9813	19.3417	18.9933	13.9876
-7	52.5758	56.4731	56.5477	42.0505	41.6487	44.6985
-6	84.172	74.8395	88.129	72.1433	68.3662	73.4408
-5	93.1312	100	92.9969	77.6094	83.3333	72.4974
-4	92.086	97.3869	95.595	76.7383	81.1557	73.6625

## Sheet: Suppl.2E
Log (M)	TRP2			TRP3
-12	26.3879	30.2236	25.2235	26.6823	24.9306	19.6578
-11	29.1647	24.4531	31.6285	20.5134	22.2301	23.7532
-10	32.251	29.0008	33.3975	22.3191	26.3643	21.3614
-9	33.7851	38.0646	36.8212	23.7138	25.6042	28.4738
-8	53.9138	50.3389	56.0795	36.0125	34.4899	40.9813
-7	79.8334	84.1204	84.2025	79.5758	73.4731	72.5477
-6	93.5892	92.3234	96.9419	80.4598	86.2073	87.5948
-5	93.4444	100	96.2965	88.7722	90.2369	86.4817
-4	95.2946	98.1256	92.1545	92.3887	88.2368	90.3115
