# Supplementary material for: Tachykinin signaling inhibits task-specific behavioral responsiveness in honeybee workers
Source: eLife. 2021 Mar 24;10:e64830. doi: 10.7554/eLife.64830 (PMC8016481; doi:10.7554/eLife.64830)
Supplement: Figure 5—source data 3. [file elife-64830-fig5-data3.xlsx]

## Sheet: Suppl.3A
	ddH2O			TRP2
Control	1.239	1	1.304	9.157	10.923	10.206
PTX	1.539	1.826	2.079	15.058	16.387	12.006
CTX	18.981	16.723	16.035	22.197	20.493	23.072

## Sheet: Suppl.3B
	ddH2O			TRP2
Control	1.509	1	1.833	86.752	90.385	95.777
YM-254809	2.79	3.723	1.035	53.826	50.147	56.583
H89	3.551	2.309	2.639	18.636	15.003	13.325
