# Supplementary material for: Tachykinin signaling inhibits task-specific behavioral responsiveness in honeybee workers
Source: eLife. 2021 Mar 24;10:e64830. doi: 10.7554/eLife.64830 (PMC8016481; doi:10.7554/eLife.64830)
Supplement: Figure 5—source data 4. [file elife-64830-fig5-data4.xlsx]

## Sheet: Suppl.4A
Time (s)	TRP2	TRP3	Hanks
1	0.051	0.05	-0.029
2	-0.013	0.065	0.017
3	0.009	0.041	0.004
4	0.058	0.044	0.004
5	0.075	-0.011	-0.001
6	0.048	-0.007	-0.007
7	0.075	0.065	0.007
8	0.089	0.077	0.008
9	0.052	0.025	0.002
10	0.076	0.066	0.007
11	0.9	0.782	0.146
12	1.132	0.82	0.103
13	1.259	0.912	0.101
14	1.159	0.905	0.1
15	1.203	0.922	0.122
16	1.192	0.93	0.103
17	1.088	1.005	0.115
18	1.18	0.952	0.148
19	1.222	0.941	0.104
20	1.186	0.972	0.108
21	1.133	0.946	0.075
22	1.198	0.958	0.106
23	1.187	0.88	0.097
24	1.225	0.944	0.104
25	1.183	0.946	0.055
26	1.138	0.888	0.098
27	1.179	0.946	0.105
28	1.162	0.869	0.096
29	1.176	0.866	0.126
30	1.193	0.938	0.104
31	1.161	0.819	0.091
32	1.105	0.814	0.09
33	1.168	0.852	0.064
34	1.181	0.815	0.09
35	1.105	0.848	0.098
36	1.156	0.864	0.066
37	1.095	0.865	0.096
38	1.083	0.793	0.088
39	1.118	0.858	0.125
40	1.089	0.779	0.086
41	1.102	0.819	0.091
42	1.012	0.88	0.097
43	1.086	0.839	0.063
44	1.088	0.871	0.106
45	1.022	0.863	0.095
46	1.088	0.788	0.087
47	1	0.855	0.095
48	0.997	0.785	0.037
49	1.079	0.759	0.084
50	0.942	0.721	0.09
51	0.937	0.768	0.055
52	0.98	0.76	0.064
53	0.938	0.787	0.087
54	0.976	0.757	0.094
55	0.994	0.724	0.08
56	0.995	0.754	0.133
57	0.912	0.742	0.072
58	0.987	0.752	0.073
59	0.896	0.764	0.124
60	0.942	0.741	0.112

## Sheet: Suppl.4B
Time (s)	TRP2	TRP3	HBM
1	0.0459	-0.0365	0.0204
2	-0.0117	-0.0472	-0.0348
3	0.0081	0.0081	0.0482
4	-0.0522	0.0056	0.033
5	-0.0675	-0.0302	-0.0084
6	0.0432	0.0472	-0.092
7	0.0675	-0.056	0.0096
8	0.0801	0.0321	0.0084
9	0.0468	0.0027	0.0091
10	0.084	0.0188	0.0024
11	0.061	0.0427	0.1032
12	0.8188	0.5731	0.1116
13	1.0331	0.72317	0.1512
14	1.0431	0.73017	0.12
15	1.1827	0.82789	0.1024
16	1.0728	0.85096	0.1236
17	0.9792	0.73	0.148
18	1.062	0.72811	0.166
19	1.1098	0.77977	0.1048
20	1.0674	0.76031	0.1496
21	1.0197	0.7874	0.166
22	0.9782	0.80346	0.1172
23	1.0683	0.78488	0.0864
24	1.1025	0.76094	0.1248
25	1.1047	0.69685	0.156
26	1.0242	0.71694	0.1876
27	1.0611	0.74277	0.106
28	0.9458	0.75159	0.1352
29	1.0584	0.73143	0.1852
30	1.0737	0.66206	0.1548
31	1.0449	0.74403	0.079
32	0.9945	0.66815	0.0808
33	1.0512	0.72828	0.1328
34	1.0629	0.74088	0.108
35	0.9545	0.69615	0.1428
36	1.0404	0.76584	0.1152
37	0.9855	0.61985	0.1152
38	0.8747	0.68229	0.0856
39	1.0062	0.70434	0.114
40	0.9801	0.78607	0.1032
41	1.0918	0.76426	0.1892
42	0.9108	0.63756	0.1864
43	0.9774	0.68418	0.0816
44	0.9792	0.71544	0.0652
45	0.9198	0.64386	0.114
46	0.9792	0.68544	0.1044
47	0.9	0.68544	0.154
48	0.8973	0.6434	0.1044
49	0.9711	0.77686	0.1208
50	0.9433	0.74718	0.086
51	0.982	0.71379	0.102
52	0.9478	0.68474	0.1008
53	0.9784	0.74781	0.1544
54	0.9442	0.77175	0.1008
55	0.9955	0.77329	0.096
56	0.9946	0.69622	0.0696
57	0.9883	0.63181	0.0984
58	0.908	0.6356	0.1296
59	0.9478	0.66346	0.1008
60	0.9064	0.69448	0.0984

## Sheet: Suppl.4C
Time (s)	DMSO	YM-254890	U73122
1	0.0561	0.05	-0.029
2	0.0143	0.065	0.017
3	-0.0099	0.041	0.004
4	-0.0638	0.044	0.004
5	0.0825	-0.011	-0.001
6	-0.0528	-0.007	-0.007
7	0.0825	0.065	0.007
8	0.7479	0.077	0.008
9	0.9572	0.025	0.002
10	1.1836	0.066	0.007
11	1.5251	0.17204	0.444
12	1.5452	0.1804	0.438
13	1.4849	0.20064	0.366
14	1.5149	0.1991	0.345
15	1.5233	0.24284	0.336
16	1.4812	0.2046	0.324
17	1.50168	0.1911	0.399
18	1.468	0.17944	0.358
19	1.4342	0.20702	0.375
20	1.5046	0.16384	0.372
21	1.3463	0.21812	0.318
22	1.4178	0.15076	0.318
23	1.4057	0.1936	0.332
24	1.4475	0.20768	0.309
25	1.4013	0.14812	0.232
26	1.3518	0.16536	0.285
27	1.3969	0.18812	0.222
28	1.3782	0.19118	0.212
29	1.3936	0.16052	0.233
30	1.41203	0.15636	0.20535
31	1.3771	0.14018	0.234
32	1.3155	0.12908	0.204
33	1.3848	0.13744	0.241
34	1.3991	0.1493	0.201
35	1.31255	0.14656	0.188
36	1.3716	0.12008	0.188
37	1.2045	0.1203	0.185
38	1.2913	0.13446	0.195
39	1.2298	0.14876	0.182
40	1.2979	0.12138	0.1963
41	1.2122	0.13018	0.203
42	1.2132	0.1436	0.2002
43	1.1946	0.14458	0.22487
44	1.1968	0.13162	0.2257
45	1.2242	0.13986	0.204
46	1.1968	0.13336	0.1952
47	1.1592	0.1381	0.19581
48	1.0967	0.1227	0.1428
49	1.1869	0.14698	0.1452
50	1.0662	0.12862	0.149852
51	1.0307	0.14896	0.225
52	1.078	0.1272	0.209
53	1.0318	0.15314	0.196
54	1.0736	0.12654	0.1888
55	1.0934	0.10028	0.2042
56	1.0945	0.10588	0.182
57	1.0032	0.12324	0.1779
58	1.0857	0.13544	0.17595
59	1.0856	0.10808	0.165
60	0.9862	0.10302	0.111
