# Supplementary material for: Tachykinin signaling inhibits task-specific behavioral responsiveness in honeybee workers
Source: eLife. 2021 Mar 24;10:e64830. doi: 10.7554/eLife.64830 (PMC8016481; doi:10.7554/eLife.64830)
Supplement: Figure 5—source data 5. [file elife-64830-fig5-data5.xlsx]

## Sheet: Suppl.5A
Log (M)	1	2	3		Time (min)	1	2	3
-13	0.048763	0.056651	0.053424		0	0.0690073	0.080307	0.06477
-12	0.164575	0.142703	0.180351		2	1	0.834544	0.927361
-11	0.172822	0.127644	0.195769		5	0.90799	0.887813	0.807103
-10	0.291502	0.236285	0.308354		10	0.807103	0.847458	0.786925
-9	0.637504	0.581929	0.53962		15	0.74657	0.645682	0.726392
-8	0.739692	0.831481	0.728935		20	0.242131	0.201776	0.302663
-7	0.854787	0.944783	0.921119		40	0.100888	0.181598	0.121065
-6	0.941198	1	0.934027		60	0.0605327	0.08071	0.060533
					90	0.0403551	0.08071	0.040355

## Sheet: Suppl.5B
Log (M)	1	2	3		Time (min)	1	2	3
-13	0.0833912	0.108409	0.099375		0	0.384615	0.423077	0.461538
-12	0.144545	0.166088	0.169562		2	0.846154	0.923077	1
-11	0.226546	0.228631	0.275191		5	0.807692	0.769231	0.884615
-10	0.276581	0.274496	0.246004		10	0.769231	0.807692	0.730769
-9	0.478805	0.435024	0.419041		15	0.730769	0.807692	0.692308
-8	0.780403	0.817234	0.856845		20	0.307692	0.384615	0.346154
-7	0.870049	0.968033	0.846421		40	0.230769	0.269231	0.307692
-6	0.938846	0.876998	1		60	0.115385	0.076923	0.153846
					90	0.0384615	0.057692	0.05

## Sheet: Suppl.5C
	ctl			10nM			1uM
DMSO	0.0023	0.0041	0.0038	0.8878	0.8253	0.8655	0.9282	0.8623	0.9318
PTX	0.0025	0.0048	0.0053	0.8464	0.7883	0.7335	0.9068	0.8477	0.8106
U0126	0.0017	0.0048	0.0124	0.0436	0.0511	0.058	0.1153	0.1212	0.1399
	ctl			10nM			1uM
DMSO	0.0056	0.0072	0.0105	0.5115	0.5584	0.4829	0.6213	0.6877	0.7203
H98	0.0038	0.0079	0.0042	0.1311	0.1985	0.1663	0.2372	0.3101	0.2759
Go6983	0.0031	0.0081	0.0108	0.0343	0.0384	0.0611	0.0948	0.0613	0.0806

## Sheet: Suppl.5D
	ctl			10nM			1uM
DMSO	0.0019	0.0035	0.0051	0.4321	0.5014	0.4593	0.569	0.6221	0.6701
PTX	0.0039	0.0062	0.0088	0.4276	0.4548	0.3368	0.585	0.5023	0.6505
U0126	0.0022	0.0074	0.0059	0.033	0.0422	0.0584	0.1425	0.1661	0.1608
	ctl			10nM			1uM
DMSO	0.0015	0.0036	0.0052	0.4056	0.4283	0.4821	0.6297	0.6535	0.6952
H98	0.001	0.0054	0.0028	0.0936	0.1062	0.1335	0.1427	0.1589	0.1722
Go6983	0.0021	0.0056	0.0088	0.0235	0.0312	0.0206	0.0843	0.0984	0.0996
