# Supplementary material for: Tachykinin signaling inhibits task-specific behavioral responsiveness in honeybee workers
Source: eLife. 2021 Mar 24;10:e64830. doi: 10.7554/eLife.64830 (PMC8016481; doi:10.7554/eLife.64830)
Supplement: Figure 6—source data 1. [file elife-64830-fig6-data1.xlsx]

## Sheet: 6A
	ddH2O			TRP2
NB	0.0889	0.0986	0.1193	0.0746	0.065	0.0783
PF	0.271	0.2805	0.3252	0.2191	0.2416	0.2036
NF	0.7372	0.8135	0.7816	0.505	0.5454	0.5933

## Sheet: 6B
	dsGFP			dsTRP			dsTRPR
NB	0.4191	0.2832	0.4615	0.2287	0.1468	0.2535	0.1883	0.1662	0.2591
PF	0.5046	0.7008	0.7303	0.3811	0.2182	0.1732	0.2028	0.1377	0.2538
NF	0.8758	0.7061	0.9352	0.5487	0.4159	0.5881	0.477	0.3805	0.2499
