# Supplementary material for: Tachykinin signaling inhibits task-specific behavioral responsiveness in honeybee workers
Source: eLife journal article supplement (doi:10.7554/elife.64830), 2021-03-24
Supplement: supp [file elife_poa_e64830_Figure_5_figure_supplement_1.docx]

Figure 5A-figure supplement 1: TRPR localization and competitive binding of TRP2 and TRP3


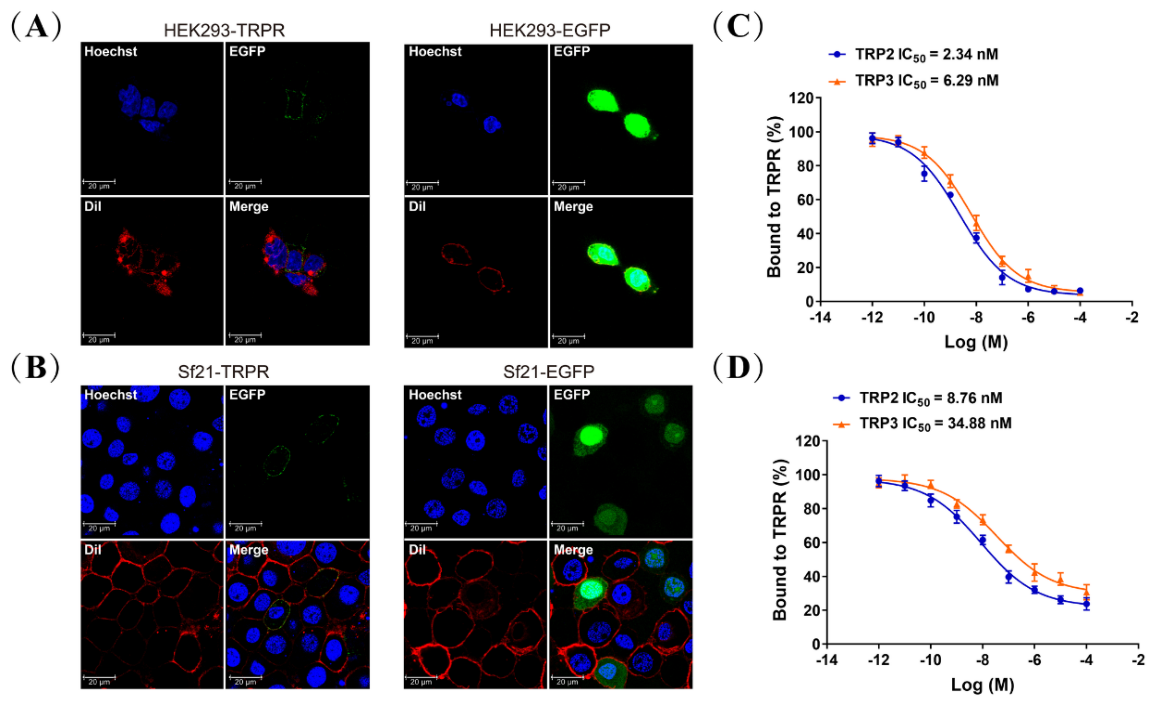


**Expression of TRPR and direct interaction of TRPs with TRPR in cell culture.** (**A**) and (**B**) HEK293 and Sf21 cells expressing TRPR-EGFP and EGFP (green) were stained with a membrane plasma probe DiI (red) and a nuclei probe Hoechst (blue), and assessed by confocal microscopy. (**C**) and (**D**) Competitive inhibition of TAMRA-TRP2 and TAMRA-TRP3 binding to TRPR in HEK293 and Sf21 cells, and all data are presented as mean ± s.e.m. from three independent experiments.
