# Supplementary material for: Tachykinin signaling inhibits task-specific behavioral responsiveness in honeybee workers
Source: eLife journal article supplement (doi:10.7554/elife.64830), 2021-03-24
Supplement: supp [file elife_poa_e64830_Figure_5_figure_supplement_3.docx]

Figure 5A-figure supplement 3: TRP2-induced cAMP accumulation is regulated by Gαq and Gαs


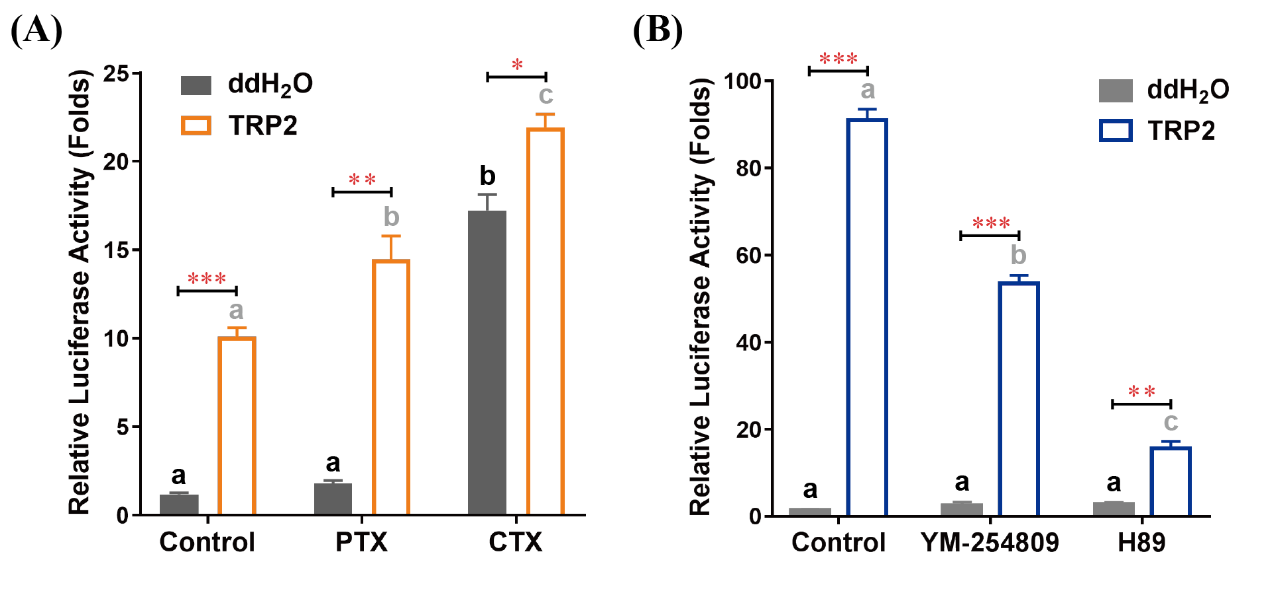


**TRP/TRPR signaling induces cAMP accumulation via Gαq and Gαs pathways.** (**A**), Effects of Gαi inhibitor pertussis toxin (PTX) and Gαs activator cholera toxin (CTX) on TRP2-mediated stimulation of cAMP accumulation. HEK293 cells expressing TRPR were pretreated with PTX (100 ng/ml) or CTX (300 ng/ml) overnight prior to treatment with TRP2 (1 μM). (**B**), Effects of Gαq inhibitor YM-254890 and PKA inhibitor H89 on TRP2-mediated stimulation of cAMP accumulation. HEK293 cells expressing TRPR were pretreated with YM-254890 (1 μM) or H89 (10 μM) for 2 hours prior to treatment with TRP2 (1 μM). All data are presented as mean ± s.e.m. from three independent experiments. Student’s t-tests were used for pairwise comparisons between water and TRP2 treatments (*: *p* < 0.05, **: *p* < 0.01, ***: *p* < 0.001). One-way ANOVAs followed by Tukey’s post-hoc tests were used for comparisons among control, PTX, and CTX groups within water or TRP2 treatments, and significant differences (*p* < 0.05) are denoted by letters.
