# Supplementary material for: Tachykinin signaling inhibits task-specific behavioral responsiveness in honeybee workers
Source: eLife journal article supplement (doi:10.7554/elife.64830), 2021-03-24
Supplement: supp [file elife_poa_e64830_Figure_5_figure_supplement_4.docx]

Figure 5A-figure supplement 4: TRP2 and TRP3 trigger intracellular Ca2+ accumulation
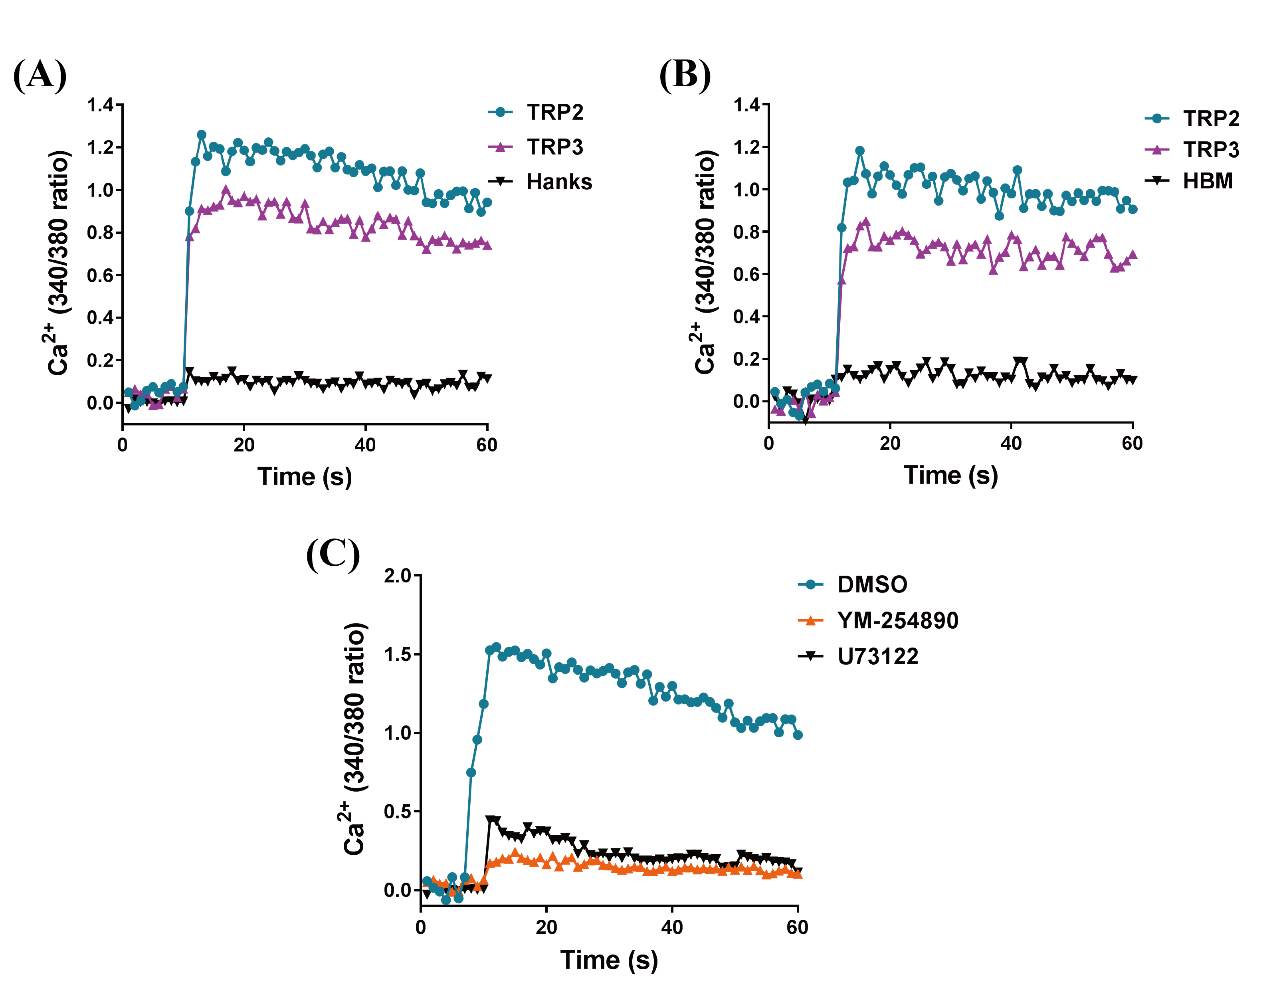


**TRP/TRPR-mediated intracellular Ca2+ influx via Gαq/PLC pathways.** HEK293 cells (**A**) and Sf21 cells (**B**) expressing TRPR were measured in response to TRP2 and TRP3 using the fluorescent Ca2+ indicator Fura-2 AM. Hanks solution (Hanks) and Hepes-buffered medium (HBM) were used as a control, respectively. (**C**), Effects of Gαq inhibitor YM-254890 and PLC inhibitor U73122 compared to vehicle control DMSO on TRP2-mediated intracellular Ca2+ influx. HEK293 cells expressing TRPR were pretreated with YM-254890 (1 μM) or U73122 (10 μM) for 2 hours then stimulated with TRP2 (1 μM). Each figure is a representative of three independent replicate experiments.
